# Supplementary material for: Enhancing Soil Quality of Short Rotation Forest Operations Using Biochar and Manure
Source: MDPI journal article supplement (doi:10.3390/f13122090), 2022-12-08
Supplement: s1 [file s1]

## Supplementary Material

**Table S1** The main effects and interactions of manure, biochar, stake location, and species on the wood stake mass loss, moisture content, and nitrogen (N), phosphorus (P), and potassium (K) loss after six months of decomposition

| Source of variation | Mass loss |         |                  | Moisture content |        |                  | Nutrient loss |        |                  |    |         |                  |    |        |                  |
|---------------------|-----------|---------|------------------|------------------|--------|------------------|---------------|--------|------------------|----|---------|------------------|----|--------|------------------|
|                     | df        |         |                  | df               |        |                  | N             |        |                  | P  |         |                  | K  |        |                  |
|                     |           | F       | <i>p</i> values  |                  | F      | <i>p</i> values  | df            | F      | <i>p</i> values  | df | F       | <i>p</i> values  | df | F      | <i>p</i> values  |
| Manure (M)          | 2         | 0.32    | 0.7389           | 2                | 1.44   | 0.3090           | 2             | 5.63   | <b>0.0420*</b>   | 2  | 1.67    | 0.2024           | 2  | 1.06   | 0.3677           |
| Biochar (B)         | 2         | 0.67    | 0.5320           | 2                | 4.40   | <b>0.0210*</b>   | 2             | 0.05   | 0.9532           | 2  | 1.81    | 0.1786           | 2  | 3.57   | <b>0.0495*</b>   |
| Location (L)        | 1         | 871.76  | <b>0.0000***</b> | 1                | 853.89 | <b>0.0000***</b> | 1             | 860.19 | <b>0.0000***</b> | 1  | 169.66  | <b>0.0000***</b> | 1  | 11.24  | <b>0.0035**</b>  |
| Species (S)         | 2         | 1546.62 | <b>0.0000***</b> | 2                | 449.20 | <b>0.0000***</b> | 2             | 537.93 | <b>0.0000***</b> | 2  | 1564.00 | <b>0.0000***</b> | 2  | 142.11 | <b>0.0000***</b> |
| M × B               | 4         | 1.57    | 0.2456           | 4                | 1.37   | 0.2691           | 4             | 13.66  | <b>0.0000***</b> | 4  | 2.30    | 0.0792           | 4  | 1.80   | 0.1729           |
| M × L               | 2         | 2.77    | 0.0892           | 2                | 3.90   | <b>0.0313*</b>   | 2             | 24.62  | <b>0.0000***</b> | 2  | 28.58   | <b>0.0000***</b> | 2  | 8.38   | <b>0.0027**</b>  |
| B × L               | 2         | 2.61    | 0.1012           | 2                | 5.33   | <b>0.0104*</b>   | 2             | 1.70   | 0.2007           | 2  | 2.93    | 0.0672           | 2  | 6.43   | <b>0.0078**</b>  |
| M × S               | 4         | 9.30    | <b>0.0000***</b> | 4                | 9.63   | <b>0.0000***</b> | 4             | 10.39  | <b>0.0000***</b> | 4  | 28.35   | <b>0.0000***</b> | 4  | 5.43   | <b>0.0003***</b> |
| B × S               | 4         | 6.11    | <b>0.0001***</b> | 4                | 3.52   | <b>0.0074**</b>  | 4             | 10.56  | <b>0.0000***</b> | 4  | 16.84   | <b>0.0000***</b> | 4  | 3.27   | <b>0.0114*</b>   |
| L × S               | 2         | 646.38  | <b>0.0000***</b> | 2                | 442.91 | <b>0.0000***</b> | 2             | 273.27 | <b>0.0000***</b> | 2  | 57.24   | <b>0.0000***</b> | 2  | 295.67 | <b>0.0000***</b> |
| M × B × L           | 4         | 1.12    | 0.3780           | 4                | 1.42   | 0.2529           | 4             | 15.20  | <b>0.0000***</b> | 4  | 7.66    | <b>0.0002***</b> | 4  | 3.48   | <b>0.0283*</b>   |
| M × B × S           | 8         | 4.06    | <b>0.0001***</b> | 8                | 4.38   | <b>0.0000***</b> | 8             | 21.93  | <b>0.0000***</b> | 8  | 5.48    | <b>0.0000***</b> | 8  | 13.09  | <b>0.0000***</b> |
| M × L × S           | 4         | 23.05   | <b>0.0000***</b> | 4                | 8.89   | <b>0.0000***</b> | 4             | 24.68  | <b>0.0000***</b> | 4  | 82.42   | <b>0.0000***</b> | 4  | 14.67  | <b>0.0000***</b> |
| B × L × S           | 4         | 6.56    | <b>0.0000***</b> | 4                | 4.13   | <b>0.0026**</b>  | 4             | 9.02   | <b>0.0000***</b> | 4  | 5.65    | <b>0.0002***</b> | 4  | 4.96   | <b>0.0006***</b> |
| M × B × L × S       | 8         | 4.22    | <b>0.0001***</b> | 8                | 4.52   | <b>0.0000***</b> | 8             | 11.66  | <b>0.0000***</b> | 8  | 26.55   | <b>0.0000***</b> | 8  | 14.47  | <b>0.0000***</b> |

Bold fonts with \*, \*\* and \*\*\* denote significant effects at  $p \leq 0.05$ ,  $p \leq 0.01$  and  $p \leq 0.001$ .

**Table S2** The main effects and interactions of manure, biochar, sample date, and soil depth on the soil nutrient contents and C: N at Shandong Province, China

| Source of variation | Total nitrogen (N) |        |                  | Total phosphorus (P) |        |                  | Total potassium (K) |        |                  | Soil organic carbon (C) |       |                  | Available N |       |                  | C: N |       |                  |
|---------------------|--------------------|--------|------------------|----------------------|--------|------------------|---------------------|--------|------------------|-------------------------|-------|------------------|-------------|-------|------------------|------|-------|------------------|
|                     | df                 | F      | <i>p</i> values  | df                   | F      | <i>p</i> values  | df                  | F      | <i>p</i> values  | df                      | F     | <i>p</i> values  | df          | F     | <i>p</i> values  | df   | F     | <i>p</i> values  |
| Manure (M)          | 2                  | 0.79   | 0.4965           | 2                    | 0.92   | 0.4183           | 2                   | 0.91   | 0.4725           | 2                       | 1.03  | 0.4127           | 2           | 1.13  | 0.3276           | 2    | 1.27  | 0.3742           |
| Biochar (B)         | 2                  | 0.52   | 0.6058           | 2                    | 1.52   | 0.2483           | 2                   | 0.05   | 0.9561           | 2                       | 1.85  | 0.1649           | 2           | 0.04  | 0.9562           | 2    | 0.15  | 0.8604           |
| Sample date (DT)    | 6                  | 407.60 | <b>0.0000***</b> | 6                    | 362.30 | <b>0.0000***</b> | 6                   | 297.93 | <b>0.0000***</b> | 3                       | 30.95 | <b>0.0000***</b> | 3           | 22.60 | <b>0.0000***</b> | 3    | 65.07 | <b>0.0000***</b> |
| Soil depth (DP)     | 1                  | 143.73 | <b>0.0000***</b> | 1                    | 1.41   | 0.2381           | 1                   | 1.32   | 0.2521           | 1                       | 64.81 | <b>0.0000***</b> | 1           | 77.93 | <b>0.0000***</b> | 1    | 1.43  | 0.2352           |
| M × B               | 4                  | 0.36   | 0.8320           | 4                    | 0.59   | 0.6736           | 4                   | 1.18   | 0.3681           | 4                       | 1.82  | 0.1348           | 4           | 2.22  | 0.0751           | 4    | 0.74  | 0.5652           |
| M × DT              | 12                 | 1.54   | 0.1219           | 12                   | 0.96   | 0.4960           | 12                  | 2.98   | <b>0.0007***</b> | 6                       | 1.29  | 0.2762           | 6           | 0.86  | 0.5291           | 6    | 0.10  | 0.9960           |
| B × DT              | 12                 | 0.51   | 0.9036           | 12                   | 1.07   | 0.3934           | 12                  | 0.41   | 0.9577           | 6                       | 0.63  | 0.7090           | 6           | 0.87  | 0.5185           | 6    | 0.86  | 0.5275           |
| M × DP              | 2                  | 0.48   | 0.6222           | 2                    | 3.62   | <b>0.0297*</b>   | 2                   | 8.63   | <b>0.0002***</b> | 2                       | 0.25  | 0.7764           | 2           | 1.52  | 0.2258           | 2    | 0.77  | 0.4647           |
| B × DP              | 2                  | 0.07   | 0.9368           | 2                    | 1.16   | 0.3177           | 2                   | 0.57   | 0.5674           | 2                       | 1.45  | 0.2411           | 2           | 0.64  | 0.5301           | 2    | 0.84  | 0.4374           |
| DT × DP             | 6                  | 11.98  | <b>0.0000***</b> | 6                    | 2.85   | <b>0.0122*</b>   | 6                   | 30.45  | <b>0.0000***</b> | 3                       | 55.67 | <b>0.0000***</b> | 3           | 2.23  | 0.0915           | 3    | 49.14 | <b>0.0000***</b> |
| M × B × DT          | 24                 | 0.36   | 0.9971           | 24                   | 1.66   | <b>0.0420*</b>   | 24                  | 3.99   | <b>0.0000***</b> | 12                      | 1.18  | 0.3156           | 12          | 0.68  | 0.7640           | 12   | 0.49  | 0.9140           |
| M × B × DP          | 4                  | 0.29   | 0.8859           | 4                    | 2.34   | 0.0591           | 4                   | 0.72   | 0.5772           | 4                       | 0.51  | 0.7257           | 4           | 1.66  | 0.1694           | 4    | 0.46  | 0.7682           |
| M × DT × DP         | 12                 | 0.99   | 0.4659           | 12                   | 1.00   | 0.4552           | 12                  | 14.35  | <b>0.0000***</b> | 6                       | 3.64  | <b>0.0033**</b>  | 6           | 1.28  | 0.2772           | 6    | 2.13  | 0.0606           |
| B × DT × DP         | 12                 | 0.70   | 0.7485           | 12                   | 0.48   | 0.9230           | 12                  | 3.99   | <b>0.0000***</b> | 6                       | 1.10  | 0.3710           | 6           | 0.71  | 0.6437           | 6    | 0.34  | 0.9115           |
| M × B × DT × DP     | 24                 | 0.75   | 0.7901           | 24                   | 1.51   | 0.0756           | 24                  | 1.89   | <b>0.0091**</b>  | 12                      | 0.71  | 0.7370           | 12          | 1.12  | 0.3597           | 12   | 0.50  | 0.9093           |

Bold fonts with \*, \*\* and \*\*\* denote significant effects at  $p \leq 0.05$ ,  $p \leq 0.01$  and  $p \leq 0.001$ .

**Table S3** The main effects and interactions of manure, biochar, sample date, and soil depth on the soil enzyme activities at Shandong Province, China

| Source of variation | Soil enzyme |        |                  |     |        |                  |        |        |                  |           |        |                  |
|---------------------|-------------|--------|------------------|-----|--------|------------------|--------|--------|------------------|-----------|--------|------------------|
|                     | Catalase    |        |                  | PPO |        |                  | Urease |        |                  | Invertase |        |                  |
|                     | df          | F      | <i>p</i> values  | df  | F      | <i>p</i> values  | df     | F      | <i>p</i> values  | df        | F      | <i>p</i> values  |
| Manure (M)          | 2           | 0.62   | 0.5677           | 2   | 2.22   | 0.1104           | 2      | 1.05   | 0.4054           | 2         | 5.74   | <b>0.0132*</b>   |
| Biochar (B)         | 2           | 0.00   | 0.9978           | 2   | 3.07   | <b>0.0481*</b>   | 2      | 0.02   | 0.9768           | 2         | 5.81   | <b>0.0127*</b>   |
| Sample date (DT)    | 6           | 109.37 | <b>0.0000***</b> | 6   | 350.65 | <b>0.0000***</b> | 6      | 487.75 | <b>0.0000***</b> | 6         | 216.15 | <b>0.0000***</b> |
| Soil depth (DP)     | 1           | 136.28 | <b>0.0000***</b> | 1   | 28.47  | <b>0.0000***</b> | 1      | 51.07  | <b>0.0000***</b> | 1         | 777.90 | <b>0.0000***</b> |
| M × B               | 4           | 1.63   | 0.2306           | 4   | 0.39   | 0.8173           | 4      | 0.21   | 0.9275           | 4         | 9.69   | <b>0.0004***</b> |
| M × DT              | 12          | 0.75   | 0.7027           | 12  | 2.72   | <b>0.0018**</b>  | 12     | 1.38   | 0.1845           | 12        | 2.29   | <b>0.0091**</b>  |
| B × DT              | 12          | 0.52   | 0.8958           | 12  | 0.27   | 0.9931           | 12     | 0.48   | 0.9235           | 12        | 6.13   | <b>0.0000***</b> |
| M × DP              | 2           | 1.91   | 0.1518           | 2   | 1.76   | 0.1747           | 2      | 2.47   | 0.0887           | 2         | 7.88   | <b>0.0005***</b> |
| B × DP              | 2           | 1.69   | 0.1889           | 2   | 1.35   | 0.2617           | 2      | 0.82   | 0.4439           | 2         | 0.58   | 0.5583           |
| DT × DP             | 6           | 5.36   | <b>0.0001***</b> | 6   | 14.40  | <b>0.0000***</b> | 6      | 7.88   | <b>0.0000***</b> | 6         | 45.80  | <b>0.0000***</b> |
| M × B × DT          | 24          | 0.69   | 0.8557           | 24  | 0.71   | 0.8440           | 24     | 0.75   | 0.7899           | 24        | 4.53   | <b>0.0000***</b> |
| M × B × DP          | 4           | 0.50   | 0.7343           | 4   | 2.13   | 0.0778           | 4      | 0.62   | 0.6476           | 4         | 3.34   | <b>0.0110*</b>   |
| M × DT × DP         | 12          | 2.59   | <b>0.0042**</b>  | 12  | 2.44   | <b>0.0052**</b>  | 12     | 2.26   | <b>0.0126*</b>   | 12        | 2.59   | <b>0.0030**</b>  |
| B × DT × DP         | 12          | 1.04   | 0.4213           | 12  | 0.52   | 0.8986           | 12     | 1.13   | 0.3440           | 12        | 3.05   | <b>0.0005***</b> |
| M × B × DT × DP     | 24          | 0.84   | 0.6830           | 24  | 0.46   | 0.9878           | 24     | 1.15   | 0.3057           | 24        | 2.34   | <b>0.0007***</b> |

Bold fonts with \*, \*\* and \*\*\* denote significant effects at  $p \leq 0.05$ ,  $p \leq 0.01$  and  $p \leq 0.001$ . PPO, polyphenol

oxidase.

**Table S4** Surface and mineral poplar, aspen, pine stake mass loss, moisture content, nitrogen (N), phosphorus (P), and potassium (K) loss responses to soil manure, biochar amendments and their interactions after six months of decomposition

| Location | Species | Source of variation | Mass loss |       |                  | Moisture content |       |                  | Nutrient loss |       |                  |    |       |                  |    |       |                  |
|----------|---------|---------------------|-----------|-------|------------------|------------------|-------|------------------|---------------|-------|------------------|----|-------|------------------|----|-------|------------------|
|          |         |                     | df        | F     | <i>p</i> values  | df               | F     | <i>p</i> values  | N             |       |                  | P  |       |                  | K  |       |                  |
|          |         |                     |           |       |                  |                  |       |                  | df            | F     | <i>p</i> values  | df | F     | <i>p</i> values  | df | F     | <i>p</i> values  |
| Surface  | Poplar  | Manure (M)          | 2         | 2.51  | 0.1971           | 2                | 2.22  | 0.1895           | 2             | 0.91  | 0.4516           | 2  | 15.19 | <b>0.0135*</b>   | 2  | 11.28 | <b>0.0227*</b>   |
|          |         | Biochar (B)         | 2         | 1.21  | 0.3018           | 2                | 2.67  | 0.0734           | 2             | 2.19  | 0.1163           | 2  | 23.33 | <b>0.0000***</b> | 2  | 0.49  | 0.6129           |
|          |         | M × B               | 4         | 5.69  | <b>0.0003***</b> | 4                | 0.61  | 0.6566           | 4             | 18.34 | <b>0.0000***</b> | 4  | 24.59 | <b>0.0000***</b> | 4  | 9.46  | <b>0.0000***</b> |
|          | Aspen   | Manure (M)          | 2         | 22.13 | <b>0.0017**</b>  | 2                | 0.66  | 0.5520           | 2             | 19.86 | <b>0.0084**</b>  | 2  | 13.11 | <b>0.0175*</b>   | 2  | 6.53  | 0.0549           |
|          |         | Biochar (B)         | 2         | 1.98  | 0.1425           | 2                | 5.69  | <b>0.0044**</b>  | 2             | 4.20  | <b>0.0173*</b>   | 2  | 1.47  | 0.2342           | 2  | 2.17  | 0.1183           |
|          |         | M × B               | 4         | 3.52  | <b>0.0094**</b>  | 4                | 0.32  | 0.8614           | 4             | 3.36  | <b>0.0121*</b>   | 4  | 7.10  | <b>0.0000***</b> | 4  | 5.37  | <b>0.0005***</b> |
|          | Pine    | Manure (M)          | 2         | 0.24  | 0.7966           | 2                | 0.35  | 0.7159           | 2             | 1.90  | 0.2299           | 2  | 1.90  | 0.1542           | 2  | 3.74  | 0.0882           |
|          |         | Biochar (B)         | 2         | 10.32 | <b>0.0001***</b> | 2                | 3.73  | <b>0.0268*</b>   | 2             | 6.37  | <b>0.0023**</b>  | 2  | 1.67  | 0.1923           | 2  | 5.45  | <b>0.0054**</b>  |
|          |         | M × B               | 4         | 4.28  | <b>0.0028**</b>  | 4                | 1.36  | 0.2530           | 4             | 8.37  | <b>0.0000***</b> | 4  | 1.09  | 0.3641           | 4  | 8.49  | <b>0.0000***</b> |
| Mineral  | Poplar  | Manure (M)          | 2         | 0.85  | 0.4726           | 2                | 0.65  | 0.5560           | 2             | 3.01  | 0.1595           | 2  | 12.42 | <b>0.0192*</b>   | 2  | 0.91  | 0.4712           |
|          |         | Biochar (B)         | 2         | 1.22  | 0.2990           | 2                | 6.11  | <b>0.0030**</b>  | 2             | 12.90 | <b>0.0000***</b> | 2  | 0.63  | 0.5351           | 2  | 1.68  | 0.1899           |
|          |         | M × B               | 4         | 1.67  | 0.1610           | 4                | 2.34  | 0.0587           | 4             | 23.01 | <b>0.0000***</b> | 4  | 8.41  | <b>0.0000***</b> | 4  | 13.83 | <b>0.0000***</b> |
|          | Aspen   | Manure (M)          | 2         | 6.74  | <b>0.0292*</b>   | 2                | 4.48  | 0.0954           | 2             | 7.40  | <b>0.0240*</b>   | 2  | 5.07  | 0.0514           | 2  | 0.66  | 0.5652           |
|          |         | Biochar (B)         | 2         | 1.11  | 0.3317           | 2                | 25.23 | <b>0.0000***</b> | 2             | 6.74  | <b>0.0017**</b>  | 2  | 13.99 | <b>0.0000***</b> | 2  | 44.94 | <b>0.0000***</b> |
|          |         | M × B               | 4         | 3.37  | <b>0.0119*</b>   | 4                | 13.33 | <b>0.0000***</b> | 4             | 28.70 | <b>0.0000***</b> | 4  | 27.78 | <b>0.0000***</b> | 4  | 26.84 | <b>0.0000***</b> |
|          | Pine    | Manure (M)          | 2         | 14.42 | <b>0.0148*</b>   | 2                | 3.51  | 0.1320           | 2             | 1.11  | 0.3901           | 2  | 5.56  | 0.0700           | 2  | 8.87  | <b>0.0161*</b>   |
|          |         | Biochar (B)         | 2         | 68.52 | <b>0.0000***</b> | 2                | 5.29  | <b>0.0063**</b>  | 2             | 2.91  | 0.0581           | 2  | 3.25  | <b>0.0421*</b>   | 2  | 27.73 | <b>0.0000***</b> |
|          |         | M × B               | 4         | 28.29 | <b>0.0000***</b> | 4                | 1.19  | 0.3167           | 4             | 20.12 | <b>0.0000***</b> | 4  | 21.94 | <b>0.0000***</b> | 4  | 26.01 | <b>0.0000***</b> |

Bold fonts with \*, \*\* and \*\*\* denote significant effects at  $p \leq 0.05$ ,  $p \leq 0.01$  and  $p \leq 0.001$ .

**Table S5** The main effects and interactions of manure and biochar amendments on the soil pH, EC and hydraulic properties at Shandong Province, China

| Soil hydraulic properties               | Source of variation |      |                 |             |        |                 |       |      |                 |
|-----------------------------------------|---------------------|------|-----------------|-------------|--------|-----------------|-------|------|-----------------|
|                                         | Manure (M)          |      |                 | Biochar (B) |        |                 | M × B |      |                 |
|                                         | df                  | F    | <i>p</i> values | df          | F      | <i>p</i> values | df    | F    | <i>p</i> values |
| pH                                      | 2                   | 1.55 | 0.2425          | 2           | 0.57   | 0.5764          | 4     | 0.98 | 0.4455          |
| EC                                      | 2                   | 0.93 | 0.5168          | 2           | 3.05   | 0.0594          | 4     | 1.35 | 0.2693          |
| Mass water content                      | 2                   | 1.27 | 0.3864          | 2           | 0.28   | 0.7551          | 4     | 0.2  | 0.9361          |
| Bulk density                            | 2                   | 2.56 | 0.1950          | 2           | 1.86   | 0.1723          | 4     | 4.01 | <b>0.0095**</b> |
| Volumetric water content                | 2                   | 0.11 | 0.8960          | 2           | 0.2    | 0.8230          | 4     | 0.42 | 0.7916          |
| Water storage                           | 2                   | 0.11 | 0.8960          | 2           | 0.2    | 0.8230          | 4     | 0.42 | 0.7916          |
| Maximum water holding capacity          | 2                   | 1.42 | 0.3424          | 2           | 1.26   | 0.2956          | 4     | 3.64 | <b>0.0144*</b>  |
| Capillary capacity                      | 2                   | 1.65 | 0.3020          | 2           | 1.31   | 0.2843          | 4     | 3.58 | <b>0.0155*</b>  |
| Field capacity                          | 2                   | 1.5  | 0.3285          | 2           | 1.27   | 0.2948          | 4     | 3.24 | <b>0.0236*</b>  |
| Non-capillary porosity                  | 2                   | 0.63 | 0.5673          | 2           | 1.27   | 0.2938          | 4     | 0.49 | 0.7435          |
| Capillary porosity                      | 2                   | 2.31 | 0.1145          | 2           | 1.11   | 0.3422          | 4     | 2.16 | 0.0944          |
| Total porosity                          | 2                   | 1.96 | 0.2235          | 2           | 1.04   | 0.3630          | 4     | 1.96 | 0.1227          |
| Venting quality                         | 2                   | 0.48 | 0.6415          | 2           | 0.19   | 0.8262          | 4     | 1.1  | 0.3737          |
| Lower limit of optimum moisture content | 2                   | 1.5  | 0.3285          | 2           | 1.27   | 0.2948          | 4     | 3.24 | <b>0.0236*</b>  |
| Drainage capacity                       | 2                   | 0.26 | 0.7733          | 2           | < 0.01 | 0.9964          | 4     | 0.69 | 0.6071          |
| Reasonable irrigation quota             | 2                   | 1.86 | 0.1715          | 2           | 1.14   | 0.3317          | 4     | 1.95 | 0.1242          |

Bold fonts with \* and \*\* denote significant effects at  $p \leq 0.05$  and  $p \leq 0.01$ .

**Table S6** Soil total phosphorus (P) content responses to soil manure, biochar amendments and their interactions at each sample date with soil depth combined at Shandong Province, China

| Total P             |          |      |                 |          |      |                 |          |      |                 |          |      |                 |          |      |                 |          |      |                 |          |      |                 |
|---------------------|----------|------|-----------------|----------|------|-----------------|----------|------|-----------------|----------|------|-----------------|----------|------|-----------------|----------|------|-----------------|----------|------|-----------------|
| Sample date         |          |      |                 |          |      |                 |          |      |                 |          |      |                 |          |      |                 |          |      |                 |          |      |                 |
|                     | Apr 2018 |      |                 | Jul 2018 |      |                 | Oct 2018 |      |                 | Dec 2018 |      |                 | Apr 2019 |      |                 | Jul 2019 |      |                 | Oct 2019 |      |                 |
| Source of variation | df       | F    | <i>P</i> values |
| Manure (M)          | 2        | 0.47 | 0.6560          | 2        | 0.43 | 0.6791          | 2        | 2.58 | 0.1554          | 2        | 1.94 | 0.1555          | 2        | 0.67 | 0.5448          | 2        | 1.52 | 0.2288          | 2        | 1.18 | 0.3697          |
| Biochar (B)         | 2        | 2.11 | 0.1346          | 2        | 0.54 | 0.5891          | 2        | 1.35 | 0.2702          | 2        | 1.55 | 0.2231          | 2        | 0.07 | 0.9287          | 2        | 4.85 | <b>0.0124*</b>  | 2        | 0.67 | 0.5158          |
| M × B               | 4        | 2.21 | 0.0857          | 4        | 0.97 | 0.4365          | 4        | 1.14 | 0.3521          | 4        | 1.37 | 0.2579          | 4        | 2.21 | 0.0857          | 4        | 4.28 | <b>0.0051**</b> | 4        | 1.20 | 0.3252          |

Bold fonts with \* and \*\* denote significant effects at  $p \leq 0.05$  and  $p \leq 0.01$ .

**Table S7** Soil total potassium (K), and organic matter content responses to soil manure, biochar amendments and their interactions at each sample date and soil depth at Shandong Province, China

| Sample date and soil depth | Source of variation | Soil nutrient |        |                  |                |      |                 |
|----------------------------|---------------------|---------------|--------|------------------|----------------|------|-----------------|
|                            |                     | Total K       |        |                  | Organic carbon |      |                 |
|                            |                     | df            | F      | <i>p</i> values  | df             | F    | <i>p</i> values |
| Apr 2018                   |                     |               |        |                  |                |      |                 |
| 0- 20cm                    | Manure (M)          | 2             | 0.03   | 0.9732           | 2              | 0.82 | 0.5042          |
|                            | Biochar (B)         | 2             | 0.24   | 0.7869           | 2              | 7.79 | <b>0.0068**</b> |
|                            | M × B               | 4             | 1.92   | 0.1721           | 4              | 2.83 | 0.0727          |
| 20- 40cm                   | Manure (M)          | 2             | 0.26   | 0.7829           | 2              | 0.94 | 0.4425          |
|                            | Biochar (B)         | 2             | 0.59   | 0.5680           | 2              | 1.92 | 0.1889          |
|                            | M × B               | 4             | 1.87   | 0.1800           | 4              | 1.11 | 0.3956          |
| Jul 2018                   |                     |               |        |                  |                |      |                 |
| 0- 20cm                    | Manure (M)          | 2             | 1.16   | 0.3384           | 2              | 1.27 | 0.3737          |
|                            | Biochar (B)         | 2             | 0.05   | 0.9504           | 2              | 1.89 | 0.1939          |
|                            | M × B               | 4             | 0.48   | 0.7511           | 4              | 0.79 | 0.5562          |
| 20- 40cm                   | Manure (M)          | 2             | 0.39   | 0.6911           | 2              | 0.33 | 0.7324          |
|                            | Biochar (B)         | 2             | 0.14   | 0.8698           | 2              | 0.08 | 0.9237          |
|                            | M × B               | 4             | 0.40   | 0.8032           | 4              | 0.28 | 0.8868          |
| Oct 2018                   |                     |               |        |                  |                |      |                 |
| 0- 20cm                    | Manure (M)          | 2             | 1.44   | 0.3385           | 2              | 7.88 | <b>0.0041**</b> |
|                            | Biochar (B)         | 2             | 0.09   | 0.9148           | 2              | 1.39 | 0.2765          |
|                            | M × B               | 4             | 2.68   | 0.0828           | 4              | 0.46 | 0.7638          |
| 20- 40cm                   | Manure (M)          | 2             | 0.04   | 0.9581           | 2              | 1.85 | 0.2372          |
|                            | Biochar (B)         | 2             | 1.64   | 0.2211           | 2              | 0.49 | 0.6253          |
|                            | M × B               | 4             | 1.11   | 0.3843           | 4              | 2.88 | 0.0694          |
| Dec 2018                   |                     |               |        |                  |                |      |                 |
| 0- 20cm                    | Manure (M)          | 2             | 1.61   | 0.3063           | 2              | 0.20 | 0.8243          |
|                            | Biochar (B)         | 2             | 1.99   | 0.1796           | 2              | 0.78 | 0.4806          |
|                            | M × B               | 4             | 0.49   | 0.7455           | 4              | 0.79 | 0.5526          |
| 20- 40cm                   | Manure (M)          | 2             | 1.51   | 0.2504           | 2              | 1.28 | 0.3443          |
|                            | Biochar (B)         | 2             | 0.43   | 0.6585           | 2              | 1.41 | 0.2813          |
|                            | M × B               | 4             | 2.32   | 0.1010           | 4              | 2.36 | 0.1116          |
| Apr 2019                   |                     |               |        |                  |                |      |                 |
| 0- 20cm                    | Manure (M)          | 2             | 0.67   | 0.5609           | -              | -    | -               |
|                            | Biochar (B)         | 2             | 0.13   | 0.8782           | -              | -    | -               |
|                            | M × B               | 4             | 0.95   | 0.4710           | -              | -    | -               |
| 20- 40cm                   | Manure (M)          | 2             | 3.63   | <b>0.0475*</b>   | -              | -    | -               |
|                            | Biochar (B)         | 2             | 0.38   | 0.6900           | -              | -    | -               |
|                            | M × B               | 4             | 0.92   | 0.4758           | -              | -    | -               |
| Jul 2019                   |                     |               |        |                  |                |      |                 |
| 0- 20cm                    | Manure (M)          | 2             | 780.45 | <b>0.0000***</b> | -              | -    | -               |
|                            | Biochar (B)         | 2             | 88.77  | <b>0.0000***</b> | -              | -    | -               |
|                            | M × B               | 4             | 130.02 | <b>0.0000***</b> | -              | -    | -               |
| 20- 40cm                   | Manure (M)          | 2             | 10.89  | <b>0.0101*</b>   | -              | -    | -               |
|                            | Biochar (B)         | 2             | 221.23 | <b>0.0000***</b> | -              | -    | -               |
|                            | M × B               | 4             | 269.63 | <b>0.0000***</b> | -              | -    | -               |
| Oct 2019                   |                     |               |        |                  |                |      |                 |
| 0- 20cm                    | Manure (M)          | 2             | 1.05   | 0.4299           | -              | -    | -               |
|                            | Biochar (B)         | 2             | 0.52   | 0.6058           | -              | -    | -               |
|                            | M × B               | 4             | 0.44   | 0.7783           | -              | -    | -               |
| 20- 40cm                   | Manure (M)          | 2             | 0.83   | 0.4790           | -              | -    | -               |
|                            | Biochar (B)         | 2             | 1.56   | 0.2496           | -              | -    | -               |
|                            | M × B               | 4             | 3.21   | 0.0523           | -              | -    | -               |

Bold fonts with \*, \*\*, and \*\*\* denote significant effects at  $p \leq 0.05$ ,  $p \leq 0.01$  and  $p \leq 0.001$ .

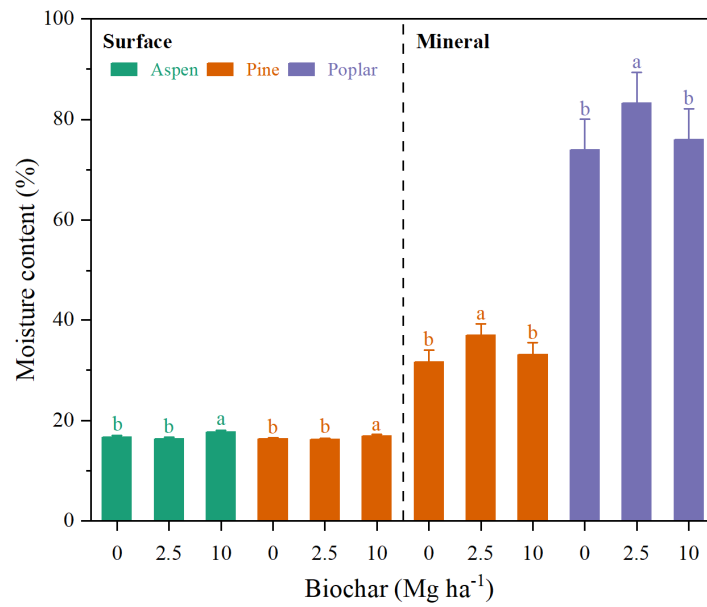

**Figure S1** Wood stake moisture content (means± SE) as affected by the main effects of biochar amendments. Different letters indicate significant differences between soil treatments ( $p \leq 0.05$ ).



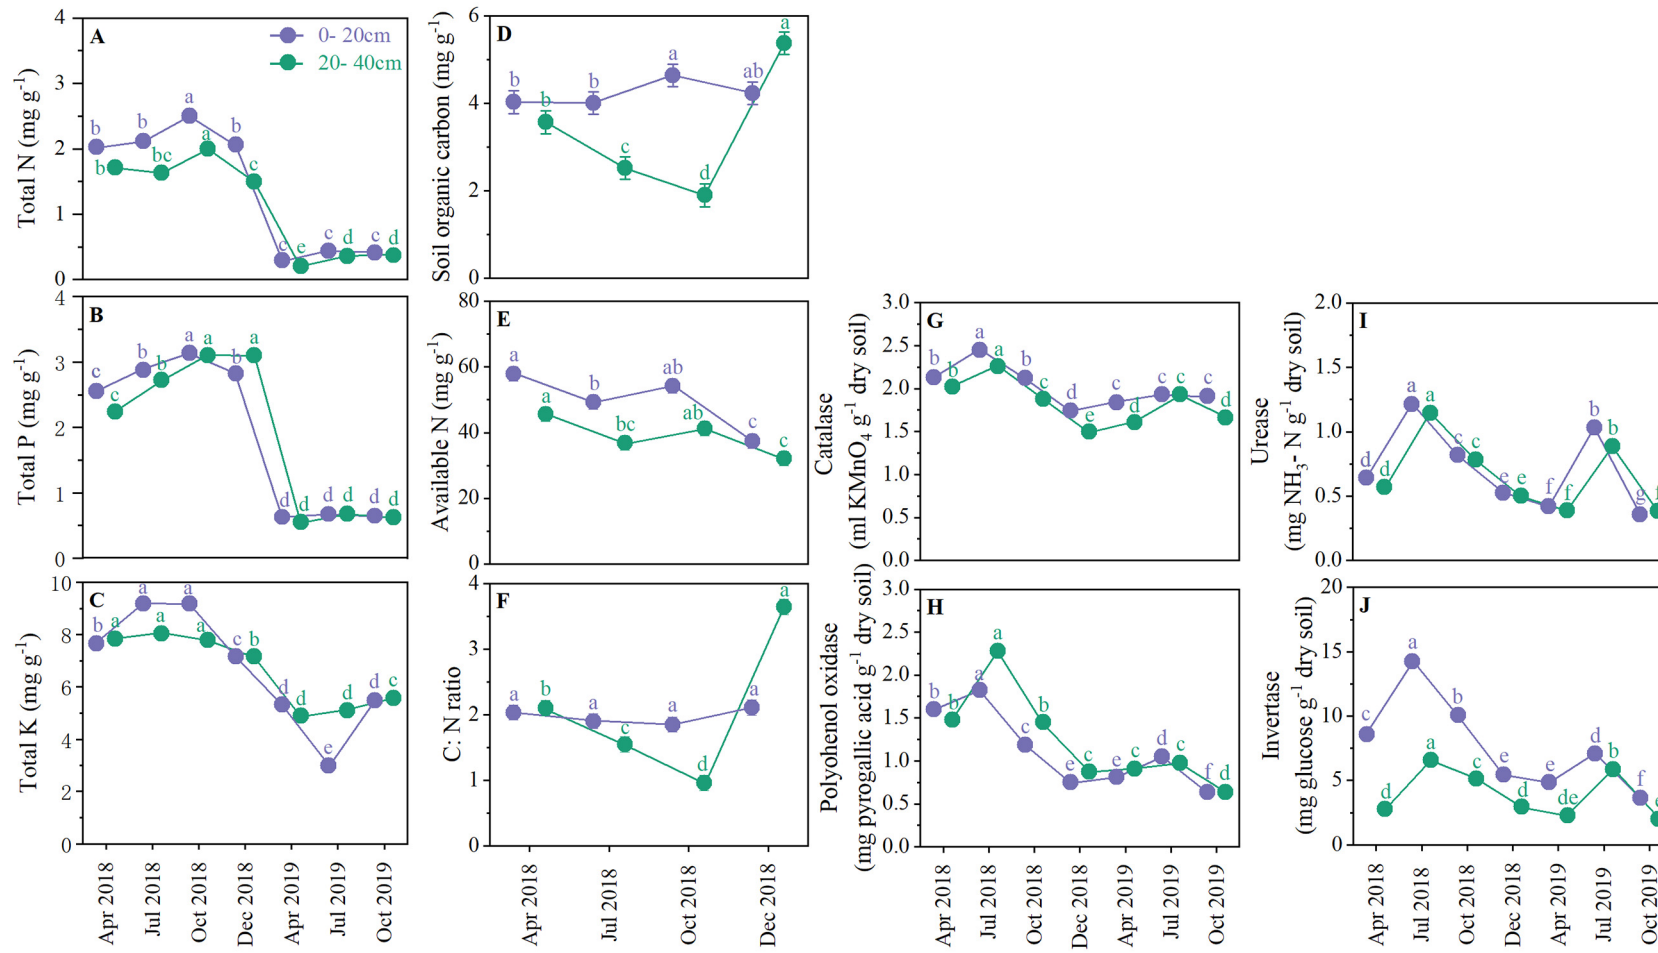

**Figure S2.** Soil nutrient content (A- F) and enzyme activity (G- J) dynamics (means  $\pm$  SE) in both 0- 20cm and 20- 40cm soil. Different letters within each soil depth indicate significant differences between sample dates ( $p \leq 0.05$ ). Soil C: N was calculated as the ratio of soil organic C and total N. PPO, polyphenol oxidase.

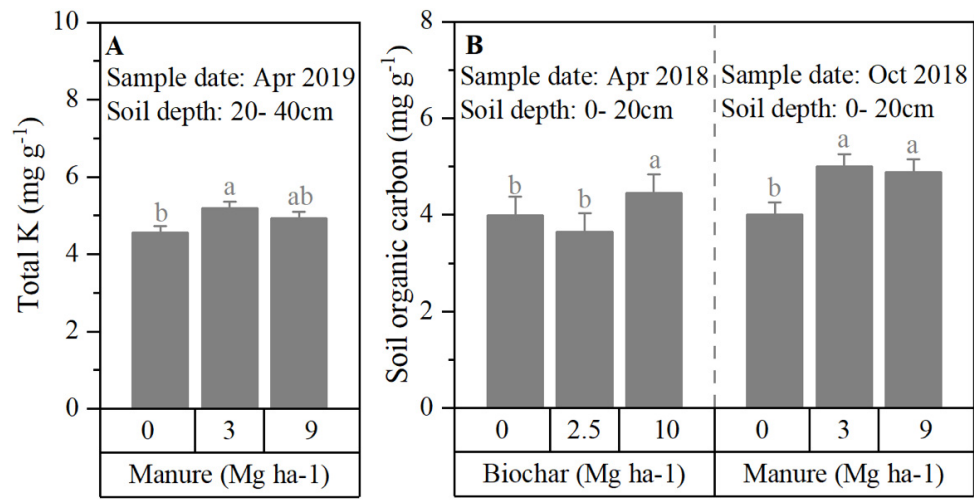

**Figure S3** Soil total potassium (K) (**A**) and organic carbon content (**B**) (means $\pm$  SE) as affected by the main effects of manure or biochar amendments. Different letters indicate significant differences between soil treatments ( $p \leq 0.05$ ).

**Table S8** Soil enzyme activity responses to soil manure, biochar amendments and their interactions at each sample date and soil depth at Shandong Province, China

| Sample date and soil depth | Source of variation | Soil enzyme |      |                 |     |      |                 |        |      |                 |           |       |                  |
|----------------------------|---------------------|-------------|------|-----------------|-----|------|-----------------|--------|------|-----------------|-----------|-------|------------------|
|                            |                     | Catalase    |      |                 | PPO |      |                 | Urease |      |                 | Invertase |       |                  |
|                            |                     | df          | F    | <i>p</i> values | df  | F    | <i>p</i> values | df     | F    | <i>p</i> values | df        | F     | <i>p</i> values  |
| Apr 2018<br>0- 20cm        | Manure (M)          | 2           | 0.53 | 0.6120          | 2   | 5.23 | <b>0.0162*</b>  | 2      | 0.24 | 0.7924          | 2         | 2.68  | 0.0989           |
|                            | Biochar (B)         | 2           | 1.37 | 0.2915          | 2   | 1.52 | 0.2460          | 2      | 0.72 | 0.4984          | 2         | 0.09  | 0.9143           |
|                            | M × B               | 4           | 0.50 | 0.7358          | 4   | 0.62 | 0.6551          | 4      | 1.30 | 0.3069          | 4         | 4.21  | <b>0.0162*</b>   |
| 20- 40cm                   | Manure (M)          | 2           | 0.27 | 0.7703          | 2   | 0.03 | 0.9719          | 2      | 0.66 | 0.5302          | 2         | 81.44 | <b>0.0000***</b> |
|                            | Biochar (B)         | 2           | 1.30 | 0.3084          | 2   | 1.81 | 0.2062          | 2      | 0.05 | 0.9518          | 2         | 5.68  | <b>0.0123*</b>   |
|                            | M × B               | 4           | 0.16 | 0.9562          | 4   | 1.14 | 0.3848          | 4      | 0.35 | 0.8421          | 4         | 8.78  | <b>0.0004***</b> |
| Jul 2018<br>0- 20cm        | Manure (M)          | 2           | 0.24 | 0.7981          | 2   | 0.90 | 0.4255          | 2      | 2.23 | 0.1401          | 2         | 0.91  | 0.4738           |
|                            | Biochar (B)         | 2           | 0.11 | 0.8937          | 2   | 0.01 | 0.9855          | 2      | 0.49 | 0.6218          | 2         | 34.07 | <b>0.0000***</b> |
|                            | M × B               | 4           | 0.36 | 0.8357          | 4   | 0.48 | 0.7511          | 4      | 2.02 | 0.1399          | 4         | 8.39  | <b>0.0018**</b>  |
| 20- 40cm                   | Manure (M)          | 2           | 1.09 | 0.4185          | 2   | 3.13 | 0.0713          | 2      | 0.00 | 0.9961          | 2         | 21.09 | <b>0.0000***</b> |
|                            | Biochar (B)         | 2           | 0.72 | 0.5082          | 2   | 0.04 | 0.9571          | 2      | 4.03 | <b>0.0457*</b>  | 2         | 9.78  | <b>0.0017**</b>  |
|                            | M × B               | 4           | 0.15 | 0.9600          | 4   | 0.92 | 0.4745          | 4      | 3.90 | <b>0.0297*</b>  | 4         | 14.52 | <b>0.0000***</b> |
| Oct 2018<br>0- 20cm        | Manure (M)          | 2           | 0.23 | 0.7996          | 2   | 7.90 | <b>0.0034**</b> | 2      | 5.80 | <b>0.0127*</b>  | 2         | 0.95  | 0.4610           |
|                            | Biochar (B)         | 2           | 0.03 | 0.9745          | 2   | 0.23 | 0.7944          | 2      | 0.18 | 0.8404          | 2         | 1.00  | 0.3959           |
|                            | M × B               | 4           | 0.98 | 0.4566          | 4   | 0.56 | 0.6945          | 4      | 0.99 | 0.4389          | 4         | 5.45  | <b>0.0097**</b>  |
| 20- 40cm                   | Manure (M)          | 2           | 0.62 | 0.5678          | 2   | 2.84 | 0.1708          | 2      | 0.02 | 0.9767          | 2         | 18.92 | <b>0.0000***</b> |
|                            | Biochar (B)         | 2           | 0.84 | 0.4540          | 2   | 1.33 | 0.3005          | 2      | 0.56 | 0.5835          | 2         | 23.92 | <b>0.0000***</b> |
|                            | M × B               | 4           | 2.29 | 0.1197          | 4   | 0.72 | 0.5928          | 4      | 1.07 | 0.4123          | 4         | 7.39  | <b>0.0011**</b>  |
| Dec 2018<br>0- 20cm        | Manure (M)          | 2           | 0.67 | 0.5627          | 2   | 6.16 | <b>0.0104*</b>  | 2      | 0.37 | 0.6940          | 2         | 0.60  | 0.5903           |
|                            | Biochar (B)         | 2           | 0.38 | 0.6908          | 2   | 0.50 | 0.6142          | 2      | 1.34 | 0.2888          | 2         | 3.94  | <b>0.0484*</b>   |
|                            | M × B               | 4           | 0.78 | 0.5598          | 4   | 1.55 | 0.2366          | 4      | 0.75 | 0.5704          | 4         | 5.27  | <b>0.0110*</b>   |
| 20- 40cm                   | Manure (M)          | 2           | 0.56 | 0.6108          | 2   | 0.01 | 0.9913          | 2      | 0.05 | 0.9509          | 2         | 0.84  | 0.4482           |
|                            | Biochar (B)         | 2           | 0.95 | 0.4122          | 2   | 1.36 | 0.2848          | 2      | 2.59 | 0.1163          | 2         | 0.85  | 0.4432           |
|                            | M × B               | 4           | 1.95 | 0.1673          | 4   | 1.98 | 0.1464          | 4      | 6.56 | <b>0.0049**</b> | 4         | 4.04  | <b>0.0165*</b>   |
| Apr 2019<br>0- 20cm        | Manure (M)          | 2           | 2.38 | 0.2082          | 2   | 5.05 | <b>0.0182*</b>  | 2      | 1.78 | 0.2802          | 2         | 0.61  | 0.5556           |
|                            | Biochar (B)         | 2           | 0.04 | 0.9606          | 2   | 0.11 | 0.9000          | 2      | 1.04 | 0.3818          | 2         | 1.42  | 0.2673           |
|                            | M × B               | 4           | 0.65 | 0.6364          | 4   | 0.46 | 0.7669          | 4      | 0.18 | 0.9460          | 4         | 1.19  | 0.3492           |
| 20- 40cm                   | Manure (M)          | 2           | 0.36 | 0.7124          | 2   | 3.50 | 0.0984          | 2      | 1.24 | 0.3814          | 2         | 0.18  | 0.8405           |
|                            | Biochar (B)         | 2           | 0.59 | 0.5717          | 2   | 0.71 | 0.5096          | 2      | 2.10 | 0.1654          | 2         | 2.99  | 0.0886           |
|                            | M × B               | 4           | 0.58 | 0.6846          | 4   | 1.77 | 0.2003          | 4      | 1.90 | 0.1751          | 4         | 1.78  | 0.1986           |
| Jul 2019<br>0- 20cm        | Manure (M)          | 2           | 0.13 | 0.8840          | 2   | 8.01 | <b>0.0033**</b> | 2      | 0.76 | 0.5245          | 2         | 2.99  | 0.1255           |
|                            | Biochar (B)         | 2           | 0.77 | 0.4839          | 2   | 0.29 | 0.7528          | 2      | 1.36 | 0.2927          | 2         | 0.79  | 0.4753           |
|                            | M × B               | 4           | 1.04 | 0.4277          | 4   | 0.76 | 0.5663          | 4      | 0.29 | 0.8775          | 4         | 1.58  | 0.2432           |
| 20- 40cm                   | Manure (M)          | 2           | 1.75 | 0.2514          | 2   | 0.91 | 0.4523          | 2      | 6.93 | 0.0503          | 2         | 11.26 | <b>0.0007***</b> |
|                            | Biochar (B)         | 2           | 1.95 | 0.1848          | 2   | 2.64 | 0.1119          | 2      | 0.78 | 0.4802          | 2         | 11.18 | <b>0.0007***</b> |
|                            | M × B               | 4           | 3.55 | <b>0.0391*</b>  | 4   | 0.26 | 0.8973          | 4      | 0.50 | 0.7350          | 4         | 21.60 | <b>0.0000***</b> |
| Oct 2019<br>0- 20cm        | Manure (M)          | 2           | 0.29 | 0.7563          | 2   | 0.74 | 0.5154          | 2      | 7.57 | <b>0.0436*</b>  | 2         | 0.13  | 0.8854           |
|                            | Biochar (B)         | 2           | 0.08 | 0.9191          | 2   | 5.14 | <b>0.0243*</b>  | 2      | 0.64 | 0.5440          | 2         | 0.04  | 0.9636           |
|                            | M × B               | 4           | 1.11 | 0.3949          | 4   | 5.88 | <b>0.0074**</b> | 4      | 0.47 | 0.7602          | 4         | 0.35  | 0.8382           |
| 20- 40cm                   | Manure (M)          | 2           | 0.75 | 0.5271          | 2   | 0.23 | 0.8068          | 2      | 0.96 | 0.4575          | 2         | 5.18  | 0.0777           |
|                            | Biochar (B)         | 2           | 3.14 | 0.0801          | 2   | 2.36 | 0.1363          | 2      | 0.64 | 0.5459          | 2         | 8.56  | <b>0.0049**</b>  |
|                            | M × B               | 4           | 1.29 | 0.3285          | 4   | 2.01 | 0.1563          | 4      | 0.85 | 0.5231          | 4         | 4.29  | <b>0.0220*</b>   |

Bold fonts with \*, \*\* and \*\*\* denote significant effects at  $p \leq 0.05$ ,  $p \leq 0.01$  and  $p \leq 0.001$ . PPO, polyphenol oxidase.

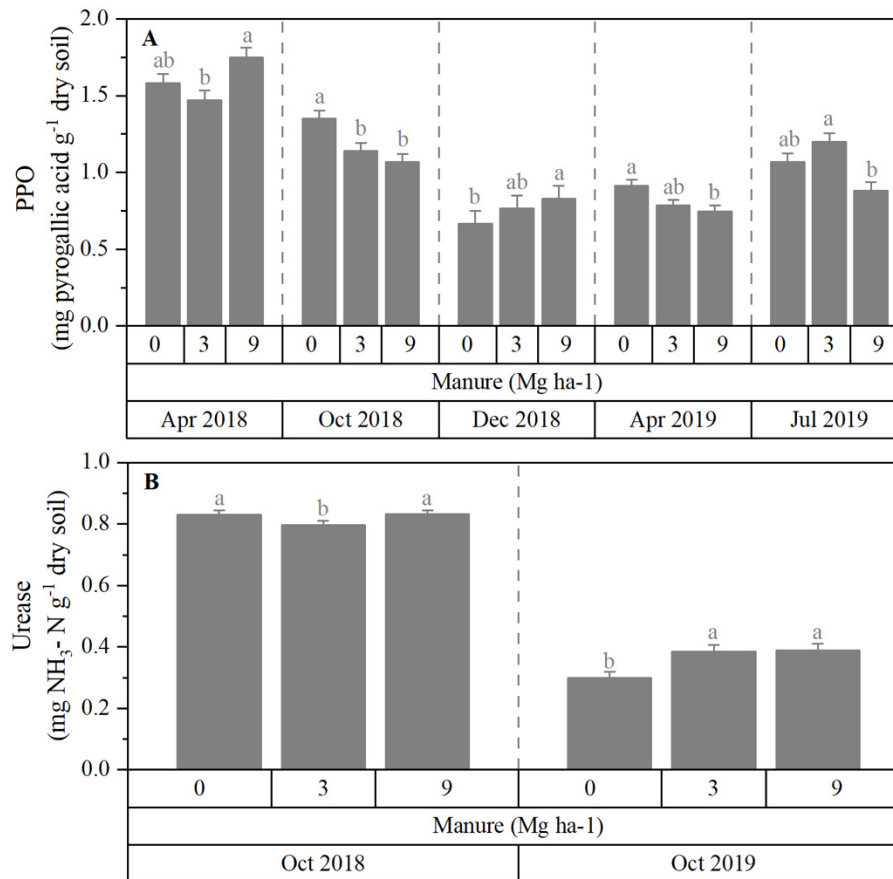

**Figure S4** Soil polyphenol oxidase (PPO) (**A**) and urease activity (**B**) (means $\pm$  SE) at 0- 20cm soil as affected by the main effects of manure. Different letters at each sample date indicate significant differences between soil treatments ( $p \leq 0.05$ ).
